# Supplementary material
Source: publisher site journal article supplement (https://www.dovepress.com/article/584168)
Supplement: Supplementary file 1 [file 584168%20Supplementary%20Material.docx]

**Supplementary Figure 1**. Risk of bias assessment for randomized control trials


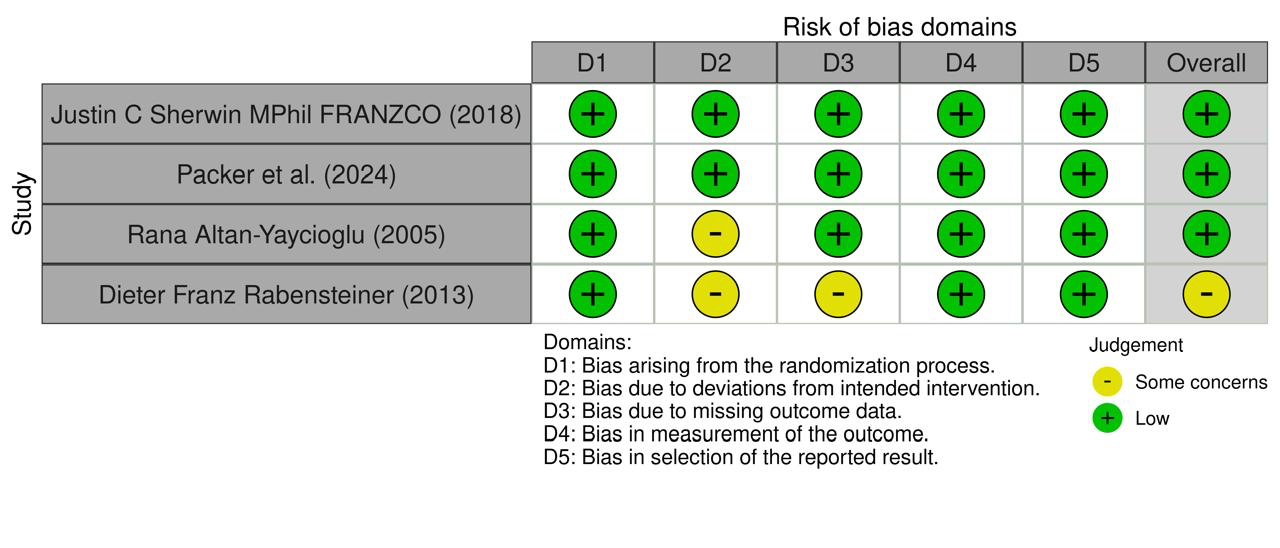

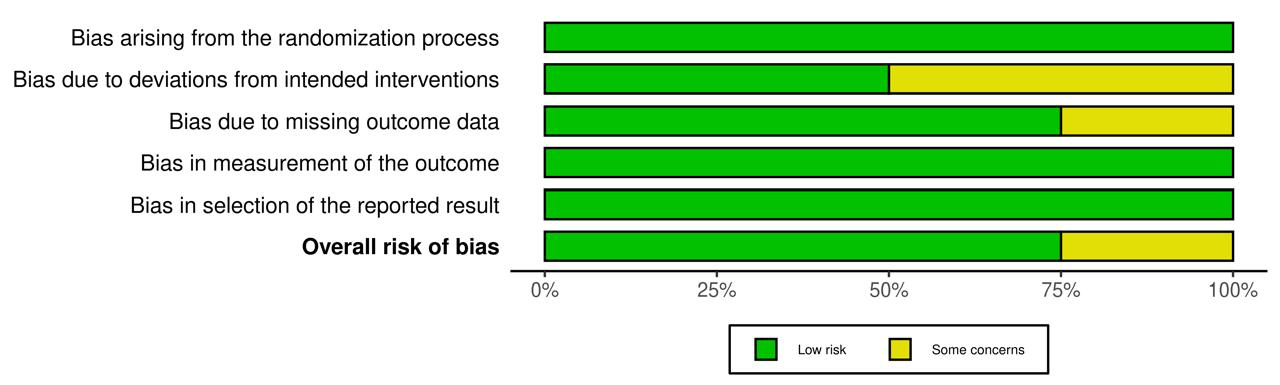


**Supplementary figure 2**. Risk of bias assessment for non-randomized trials


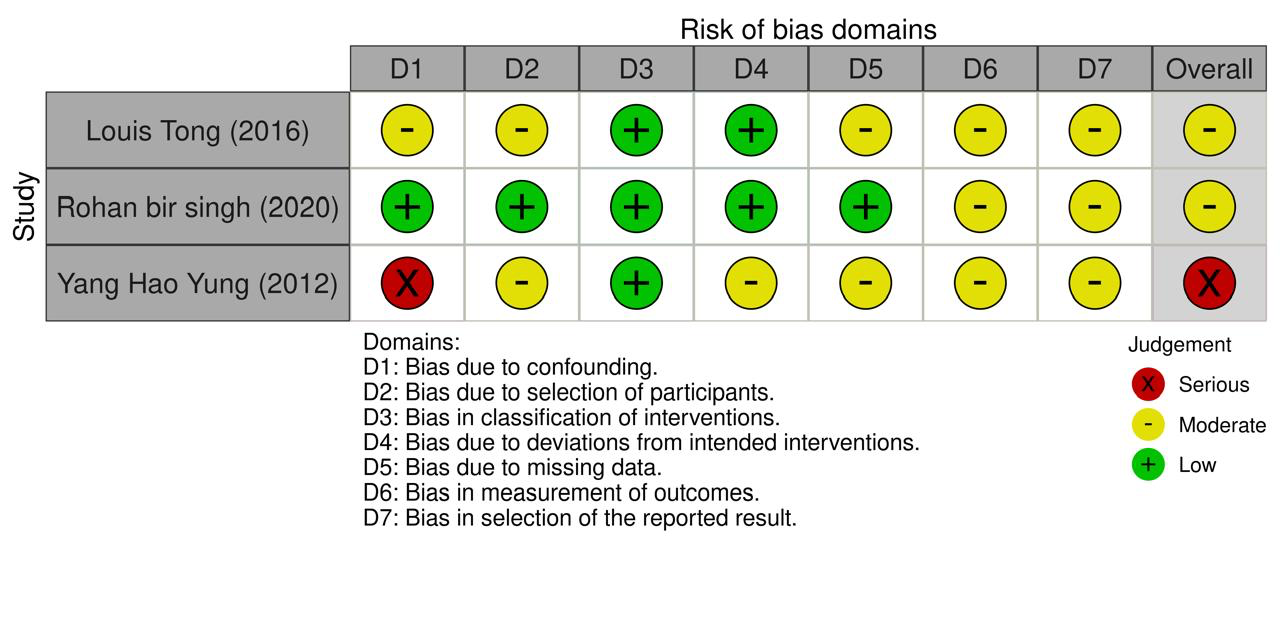

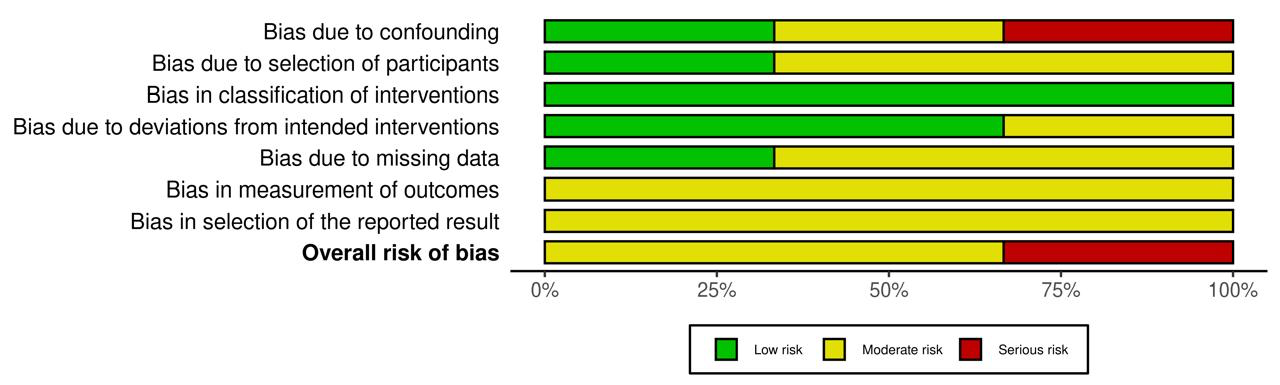


**Supplementary Table 1**. Critical appraisal for case-series

| ID | Holzchuh 2011 | Yaguchi 2012 | Balaram 2001 | Emi Obha 2010 | Yvonne Wang | Ming Cheng | Kazunori |
| --- | --- | --- | --- | --- | --- | --- | --- |
| Were there clear criteria for inclusion in the case series? | Yes | Yes | Yes | Yes | Yes | Yes | Yes |
| Was the condition measured in a standard, reliable way for all the participants included? | Yes | Yes | Yes | Yes | Yes | Yes | Yes |
| Were valid methods used for identification of the condition for all participants included ? | Yes | Yes | Yes | Yes | Yes | Yes | Yes |
| Did the case series have consecutive inclusion of participants? | Unclear | Yes | Yes | Yes | Yes | Yes | Unclear |
| Did the case series have complete inclusion of participants? | Unclear | Yes | Yes | Yes | Yes | Yes | Unclear |
| Was there clear reporting of demographics of the participants? | Yes | Yes | Yes | Yes | Yes | Yes | Yes |
| Was there clear reporting of clinical information of the participants? | Yes | Yes | Yes | Yes | Yes | Yes | Yes |
| Were the outcomes or the follow up results of cases clearly reported? | Yes | Yes | Yes | Yes | Yes | Yes | Yes |
| Was there clear reporting of the presenting site(s)/ clinic(s) demographic information? | Yes | Yes | Yes | Yes | Yes | Yes | Yes |
| Was statistical analysis appropriate? | Yes | Yes | Yes | Yes | Yes | Yes | Yes |
| Overall appraisal | Include | Include | Include | Include | Include | Include | Include |
